# Supplementary material for: Cholesterol-tethered AIEE fluorogens: formation of self-assembled nanostructures
Source: Royal Society of Chemistry journal article supplement (doi:10.1039/c5ra04417k), 2015-01-01

## Cholesterol-tethered AIEE Fluorogens: Formation of Self-Assembled Nanostructures.

Veerabhadraiah Palakollu and SriramKanvah\*

Department of Chemistry, Indian Institute of Technology Gandhinagar, Chandkheda,  
Ahmedabad 382424

e-mail: [kanvah@gmail.com](mailto:kanvah@gmail.com), [sriram@iitgn.ac.in](mailto:sriram@iitgn.ac.in)

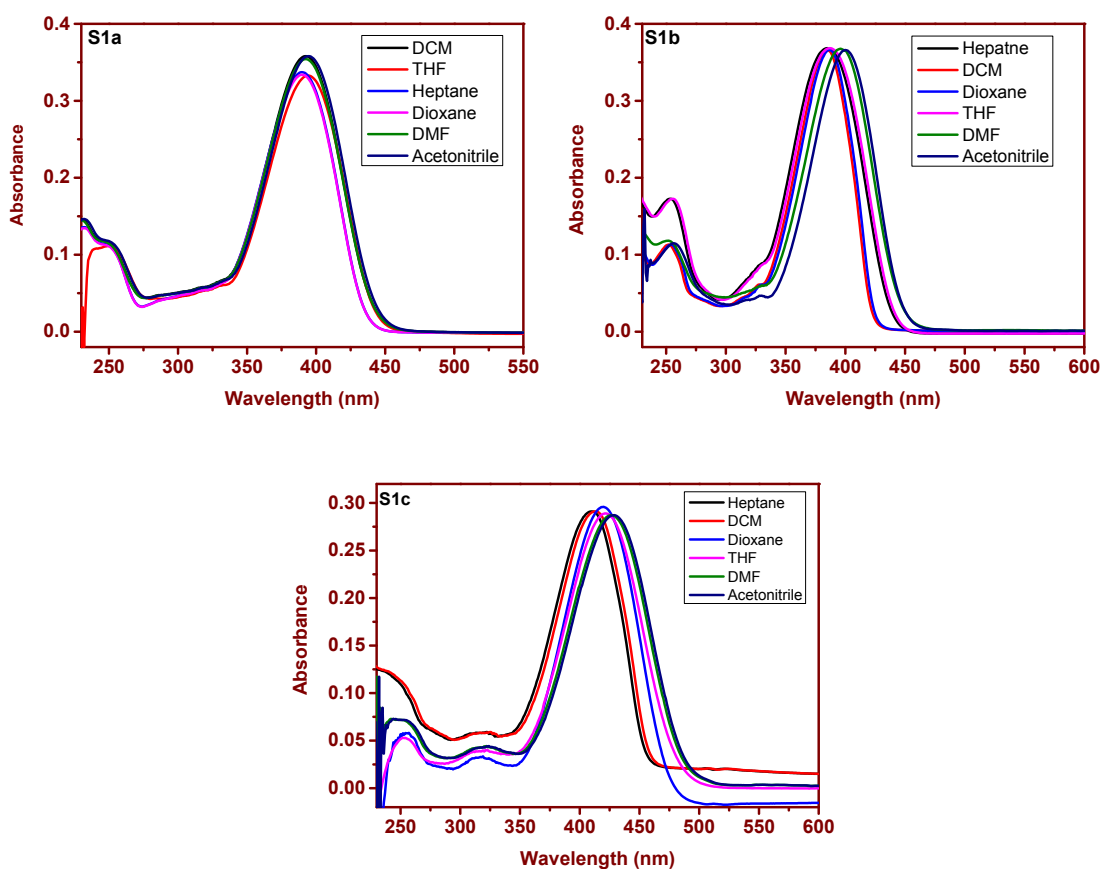

**Figure S1.** Absorption spectra of a) stilbene(1), b) stilbene-choelsterol(2) and c) diene(3) in homogeneous solvents

Table S1. Excitation data of (1) to (4) in organic solvents. The excitation data are uncorrected.

|            | Solvent            | $\lambda_{ex}$<br>(nm) |            | Solvent                         | $\lambda_{ex}$<br>(nm) |
|------------|--------------------|------------------------|------------|---------------------------------|------------------------|
| <b>(1)</b> | Heptane            | 389                    | <b>(2)</b> | Heptane                         | 384                    |
|            | Dioxane            | 390                    |            | CH <sub>2</sub> Cl <sub>2</sub> | 390                    |
|            | THF                | 395                    |            | Dioxane                         | 387                    |
|            | CH <sub>3</sub> CN | 392                    |            | CH <sub>3</sub> CN              | 385                    |
|            | Water              | 399                    |            | Water                           | 389                    |
|            |                    |                        |            |                                 |                        |
| <b>(3)</b> | Heptane            | 420                    | <b>(4)</b> | Heptane                         | 411                    |
|            | Dioxane            | 417                    |            | Dioxane                         | 419                    |
|            | THF                | 421                    |            | THF                             | 419                    |
|            | CH <sub>3</sub> CN | 413                    |            | CH <sub>3</sub> CN              | 423                    |
|            | Water              | 421                    |            | Water                           | 422                    |

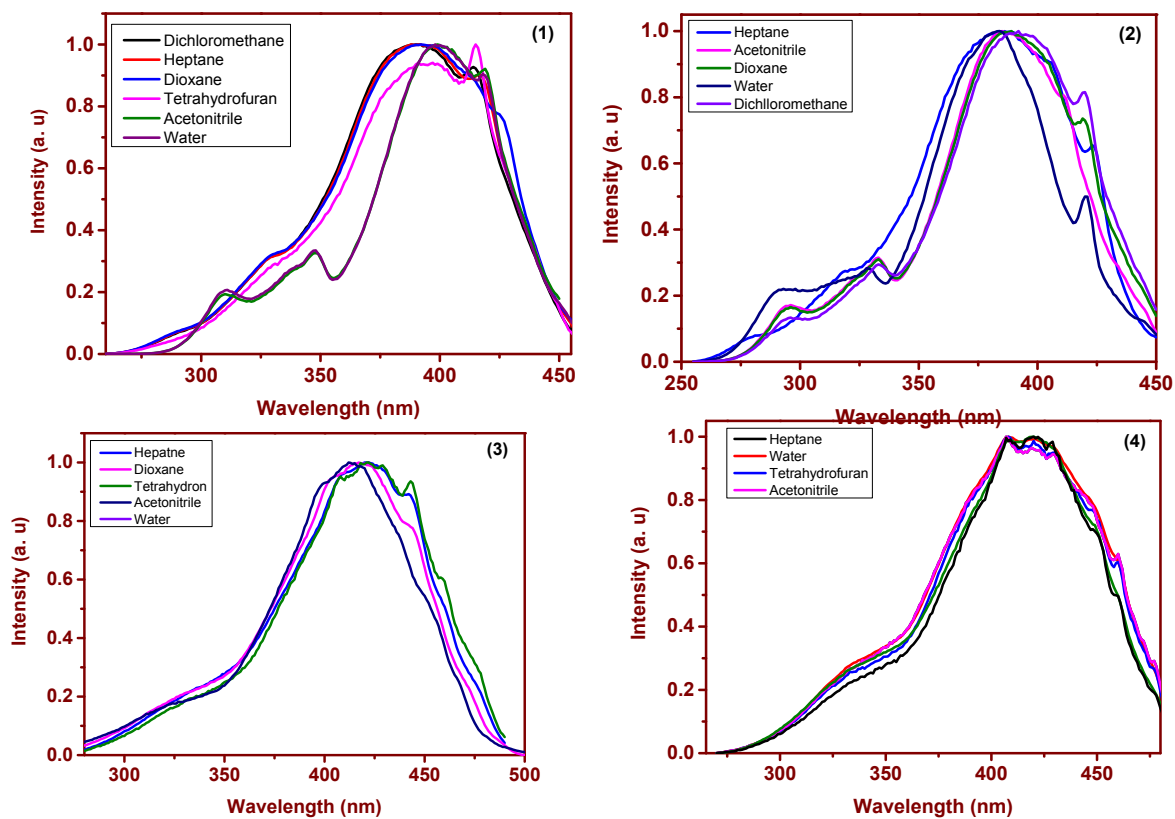

Fig S1a: Excitation Spectra of (1), (2), (3) and (4) in homogeneous solvents.

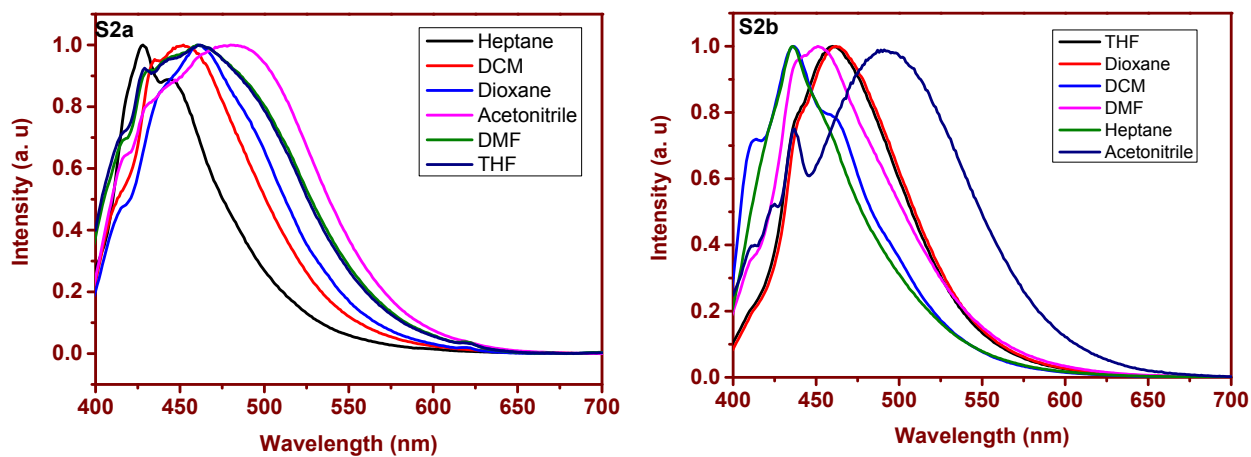

**Figure S2.** Emission spectra of a) stilbene (1), b) stilbene-cholesterol (2) in homogeneous solvents

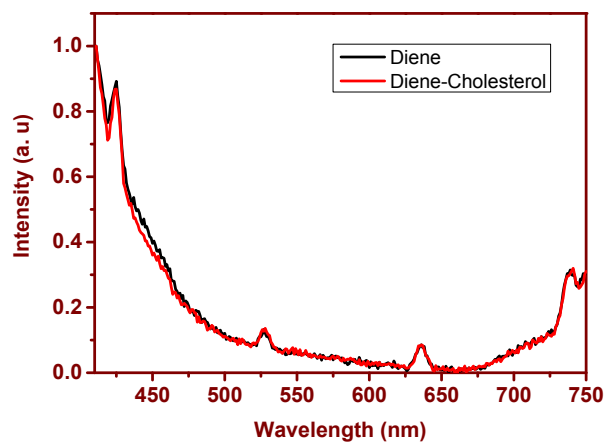

**Figure S3.** Emission spectra of diene (3) and diene-cholesterol (4) in solid state

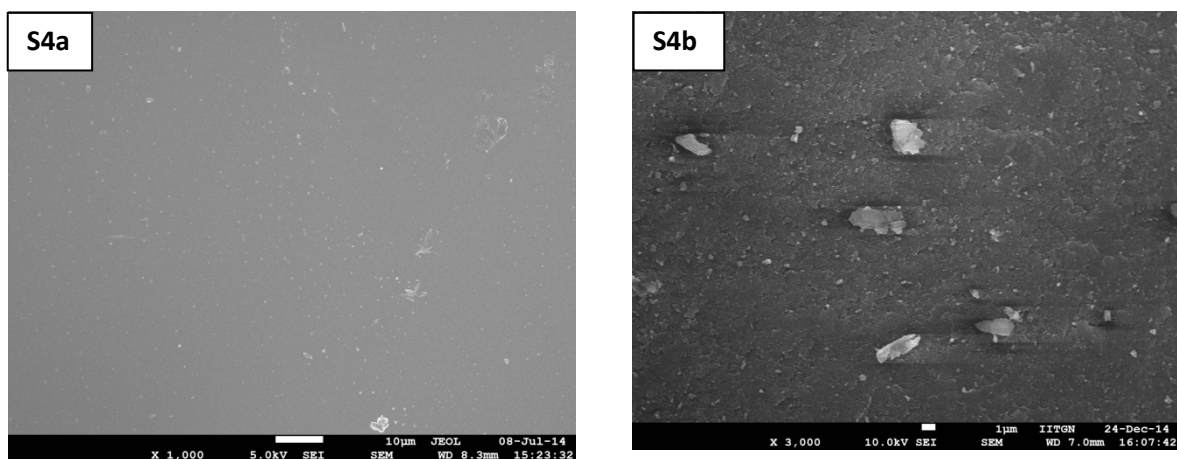

**Figure S4.** SEM images of a) stilbene (1) and b) stilbene cholesterol (2) in dioxane

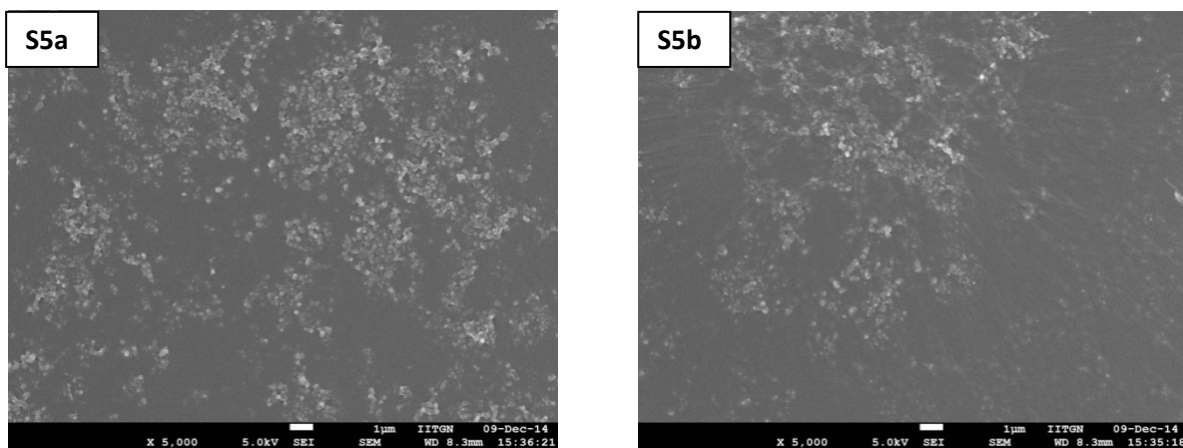

**Figure S5.** SEM images of a) diene and b) diene cholesterol in dioxane

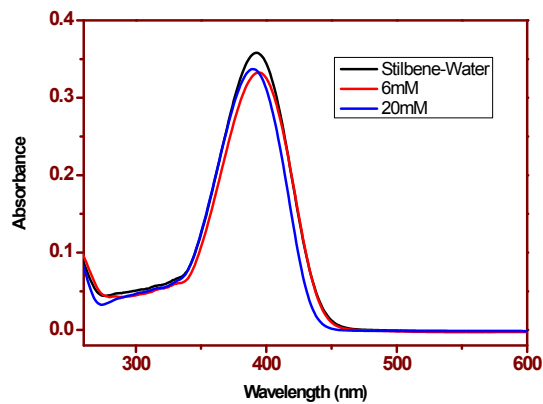

**Figure S6.** UV spectra of stilbene (1) in sodium cholate solutions

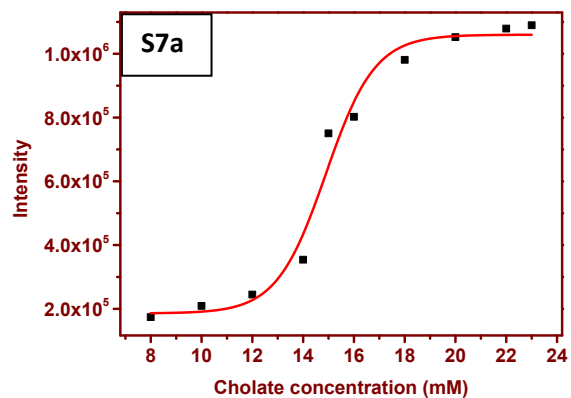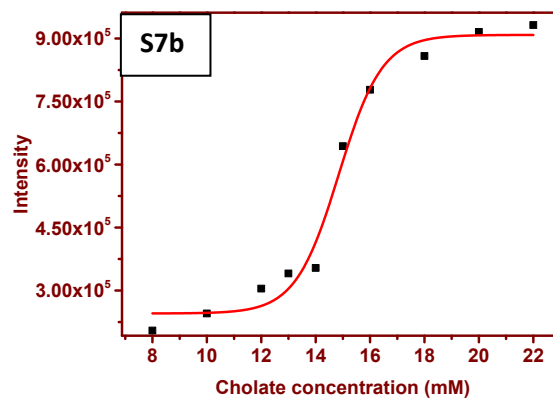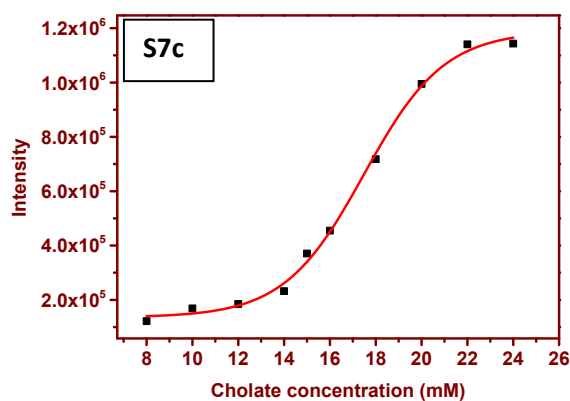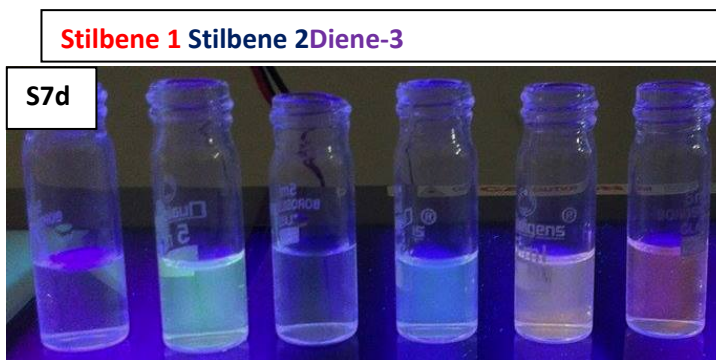

**Figure S7.** Sigmoid plots of cholate concentration vs emission intensity at  $\sim 467$  nm of a) stilbene (1) [CMC is 14.6 mM], b) stilbene cholesterol (2) [CMC is 14.7 mM] and c) diene (3) [CMC is 16.5 mM] as the probes d) Colors changes of aqueous sodium-cholate solution at 8mM and 16mM respectively in presence of dyes (stilbene (1), stilbene-cholesterol (2), diene (3)) under UV lighting conditions

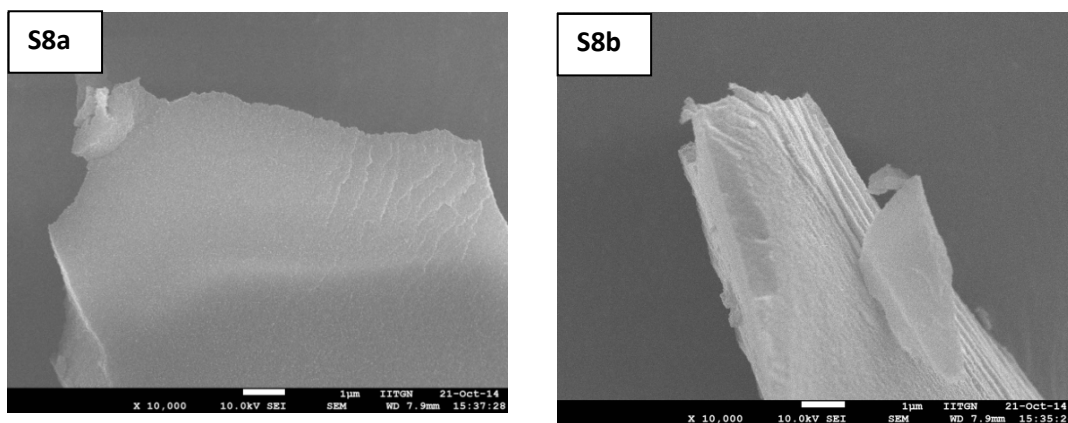

**Figure S8.** SEM images of sodium cholate at a) lower (8 mM) and b) higher concentrations (16 M) in Millipore water

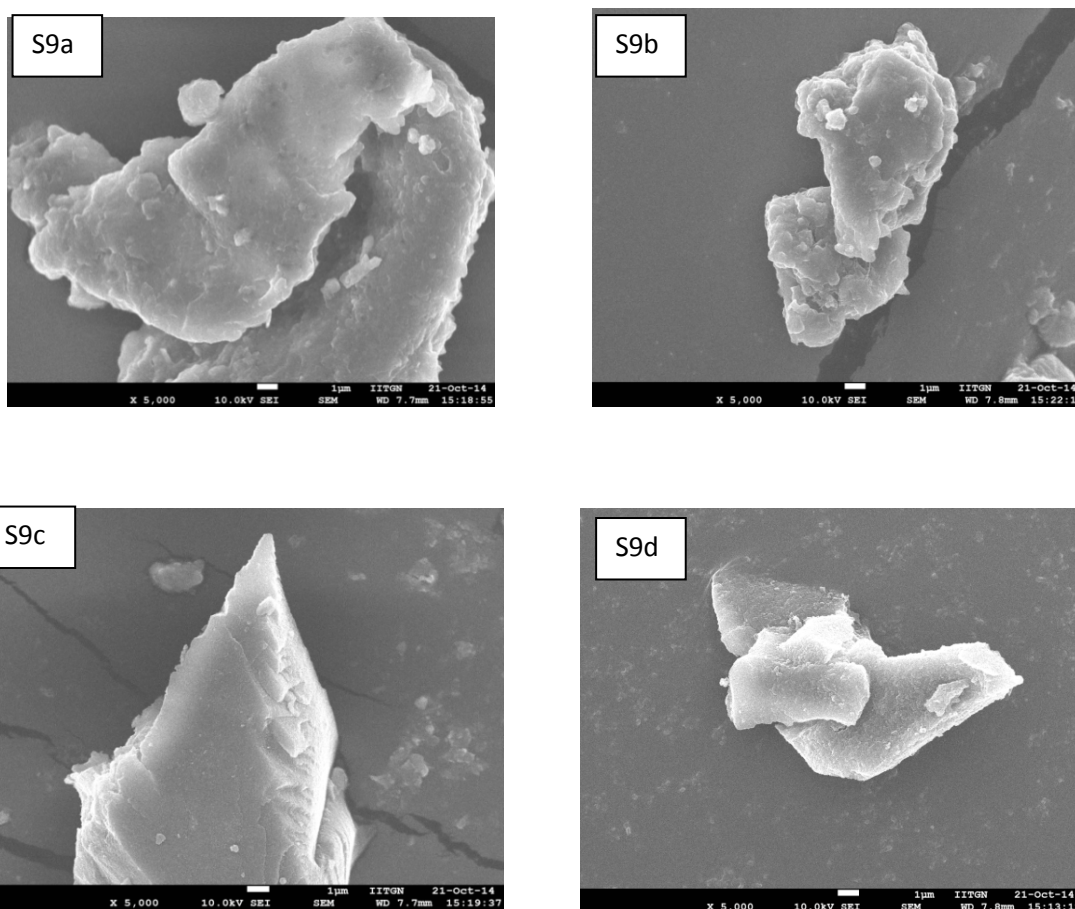

**Figure S9.** SEM images of diene (**3**) and diene cholesterol (**4**) at different concentration of cholate. a) 8mM and at b) 16mM for (**1**); (c) 8mM; d) 16mM for (**2**). Inset shows the SEM at lower magnification.

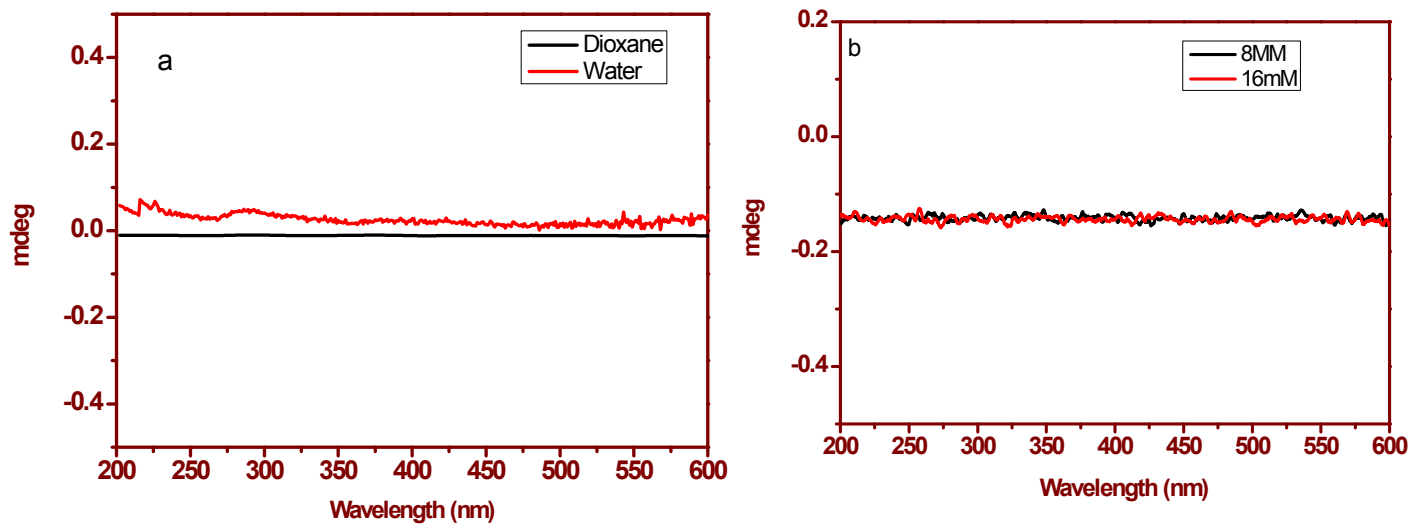

**Figure S10a.** CD Spectra of stilbene in dioxane and water; **b)** CD spectra of sodium cholate at 8mM and 16mM.

## Spectral data

### <sup>1</sup>H NMR of CPA (6)

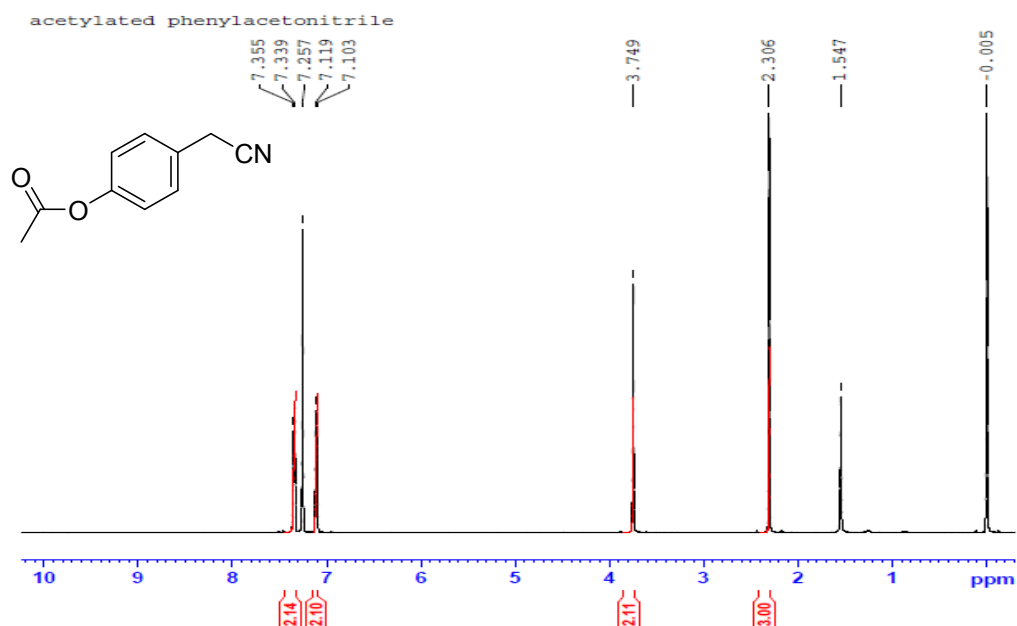

### <sup>13</sup>C NMR of CPA (6)

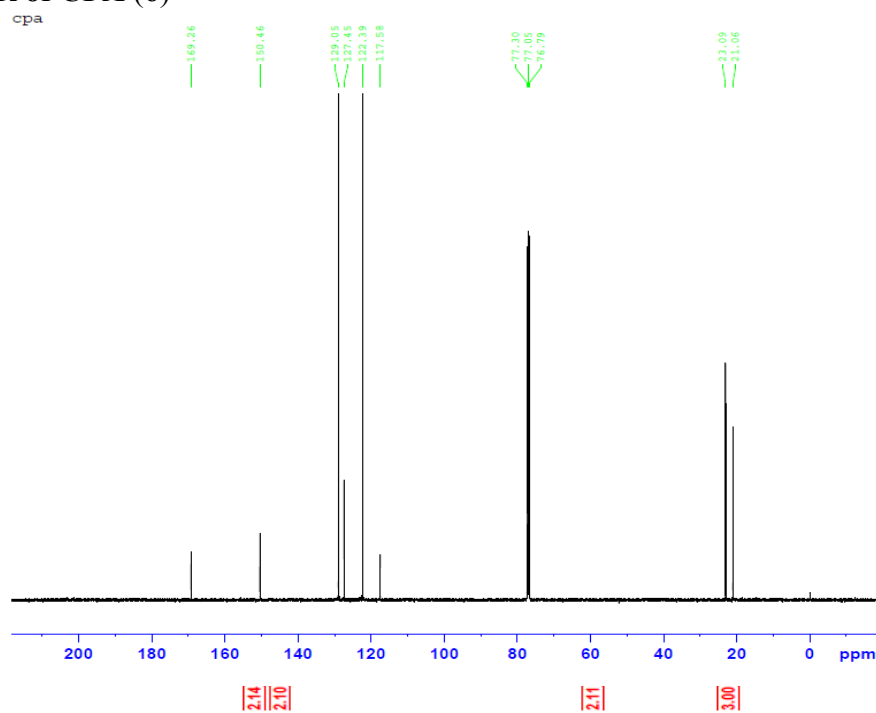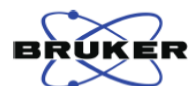

```

Current Data Parameters
NAME      Bhadra
EXPNO    737
PROCNO   1

F2 - Acquisition Parameters
Date_    20140724
Time     12.20
INSTRUM  spect
PROBHD   5 mm PABBO BB/
PULPROG  zgpg30
TD       65536
SOLVENT  CDCl3
NS       2000
DS       4
SWH      29761.904 Hz
FIDRES   0.454131 Hz
AQ       1.1010048 sec
RG       200.08
DW       16.800 usec
DE       6.50 usec
TE       301.0 K
D1       2.0000000 sec
D11      0.0300000 sec
TDO      1

===== CHANNEL f1 =====
SFO1    125.7603047 MHz
NUC1    13C
P1      8.90 usec
PLW1    29.00000000 W

===== CHANNEL f2 =====
SFO2    500.0920004 MHz
NUC2    1H
CPDPRG2 waltz16
PCPD2   80.00 usec
PLW2    17.00000000 W
PLW12   0.52061999 W
PLW13   0.33320001 W

F2 - Processing parameters
SI      32768
SF      125.7477310 MHz
WDW     EM
SSB     0
LB      1.00 Hz
GB      0
PC      1.40
    
```



**<sup>1</sup>H NMR (Z)-3-(4-(dimethylamino)phenyl)-2-(4-hydroxyphenyl)acrylonitrile (1)**

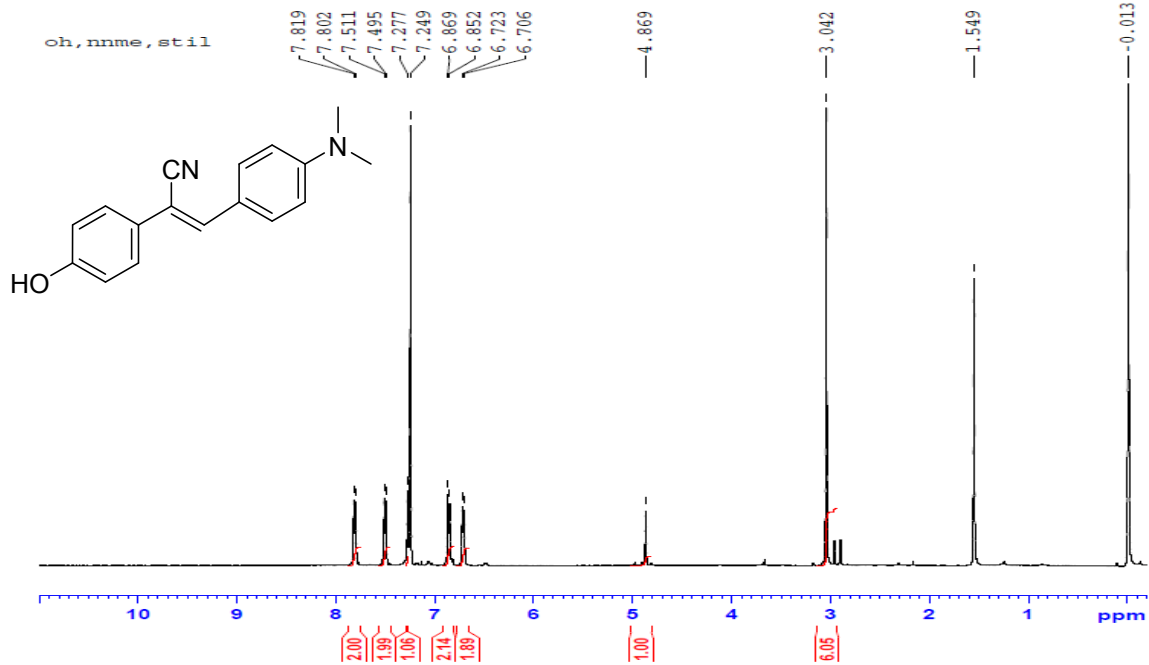

**<sup>13</sup>C NMR (Z)-3-(4-(dimethylamino)phenyl)-2-(4-hydroxyphenyl)acrylonitrile (1)**

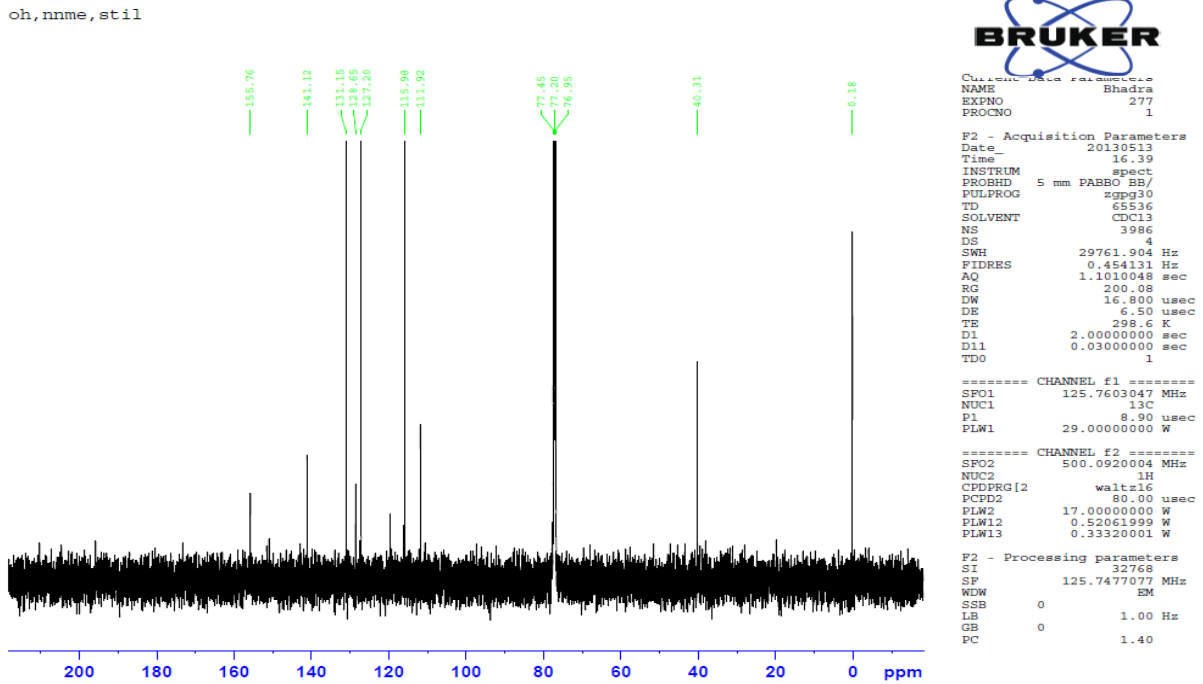

### Mass spectrum of (Z)-3-(4-(dimethylamino)phenyl)-2-(4-hydroxyphenyl)acrylonitrile (1)

Exact mass 264.13

Mass obtained in positive mode 265.1266 (M+1)

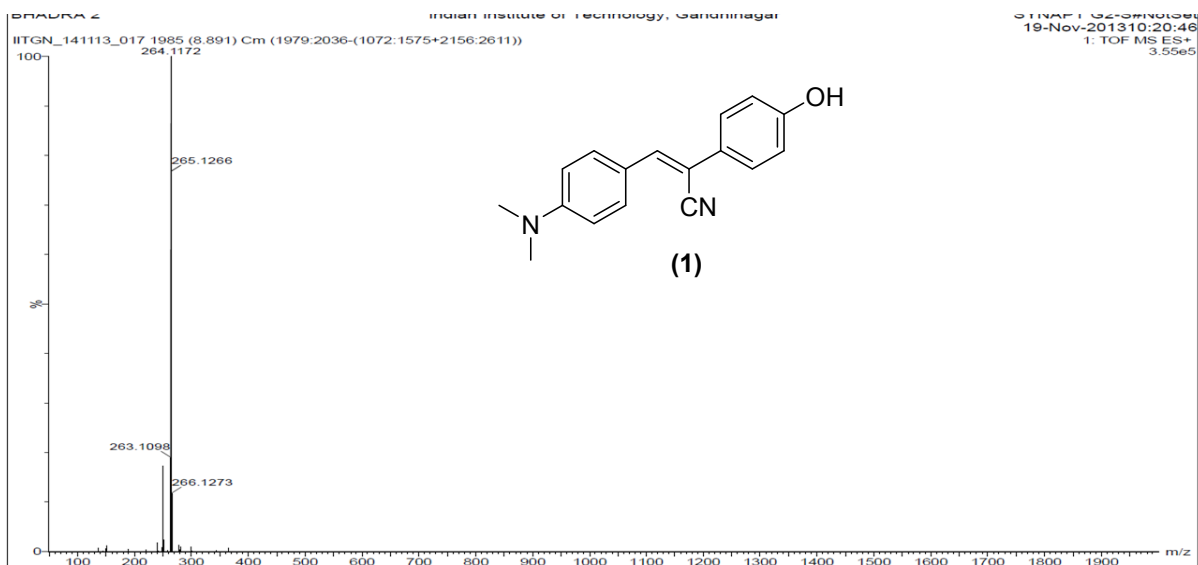

### <sup>1</sup>H NMR of (2Z,4E)-5-(4-(dimethylamino)cyclohexa-2,4-dien-1-yl)-2-(4-hydroxyphenyl)penta-2,4-dienitrile (3)

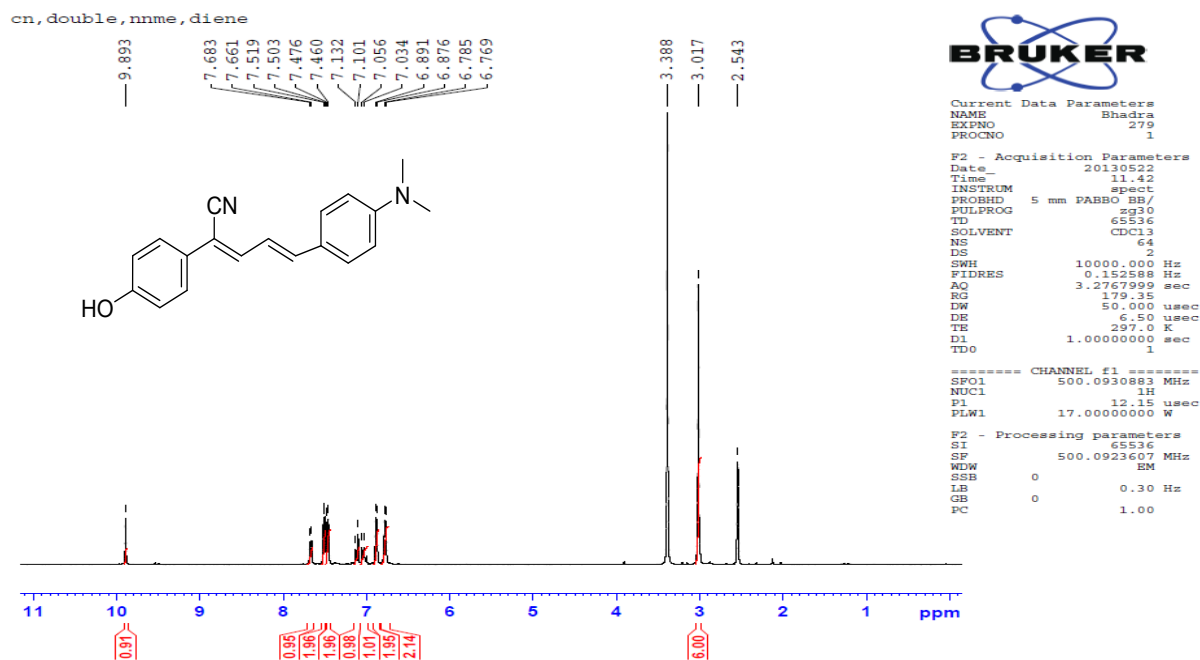

<sup>13</sup>C NMR of (2Z,4E)-5-(4-(dimethylamino)cyclohexa-2,4-dien-1-yl)-2-(4-hydroxyphenyl)penta-2,4-dienitrile (3)

cn, double, nmme, diene

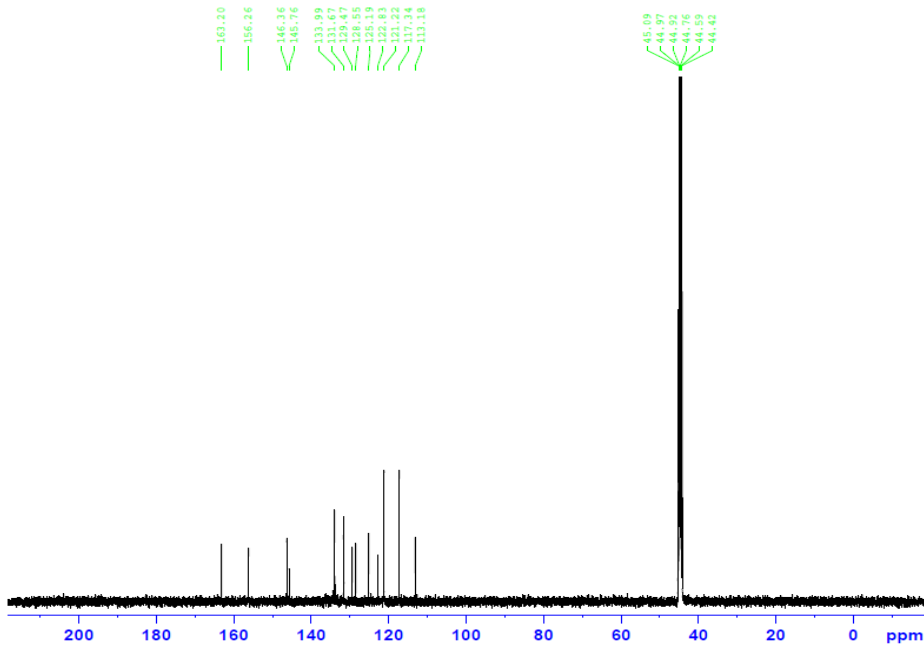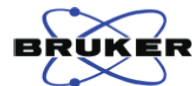

```

Current Data Parameters
NAME          Bhadra
EXPNO         280
PROCNO        1

F2 - Acquisition Parameters
Date_         20130522
Time          12.46
INSTRUM       spect
PROBHD        5 mm PABBO BB/
PULPROG       zgpg30
TD            65536
SOLVENT       CDCl3
NS            1024
DS            4
SWH           29761.904 Hz
FIDRES        0.454131 Hz
AQ            1.1010048 sec
RG            200.08
DW            16.800 usec
DE            6.50 usec
TE            299.3 K
D1            2.00000000 sec
D11           0.03000000 sec
TD0           1

===== CHANNEL f1 =====
SF01          125.7603047 MHz
NUC1          13C
P1            8.90 usec
PLW1          29.00000000 W

===== CHANNEL f2 =====
SF02          500.0920004 MHz
NUC2          1H
CPDPRG[2]    waltz16
PCPD2        80.00 usec
PLW2         17.00000000 W
PLW12        0.52061999 W
PLW13        0.33320001 W

F2 - Processing parameters
SI            32768
SF           125.7477310 MHz
WDW           EM
SSB           0
LB            1.00 Hz
GB            0
PC            1.40
    
```

**Mass spectra of (2Z,4E)-5-(4-(dimethylamino)cyclohexa-2,4-dien-1-yl)-2-(4-hydroxyphenyl)penta-2,4-dienitrile (3)**

Exact mass 290.142

Mass obtained in positive mode 291.0769 (M+1)

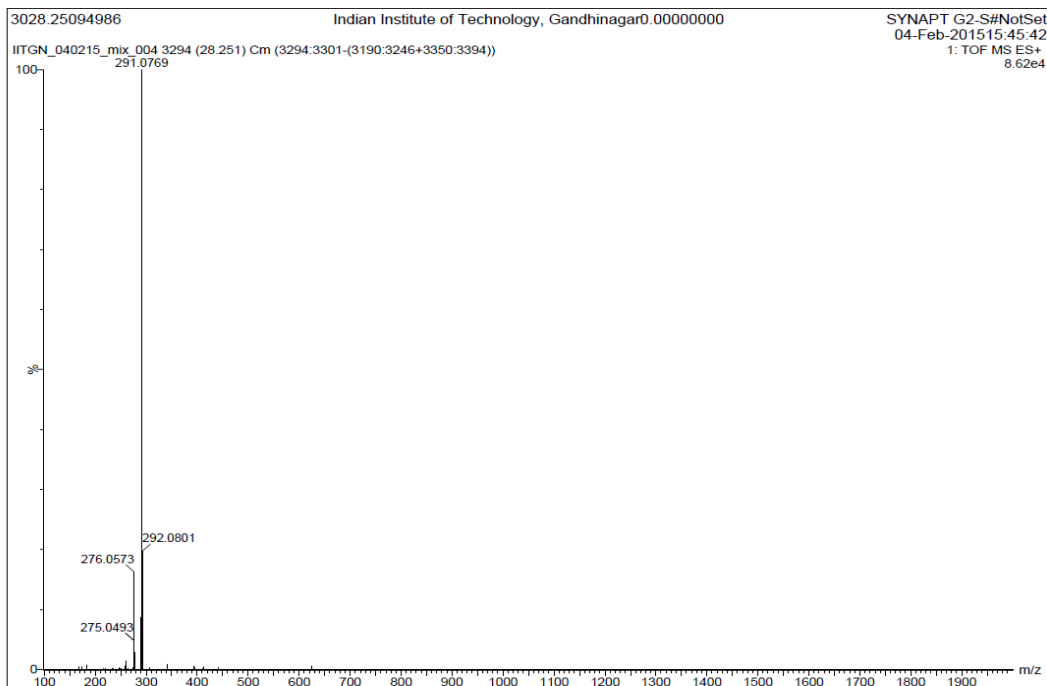

**<sup>1</sup>H NMR of stilbene-cholesterol (2)**

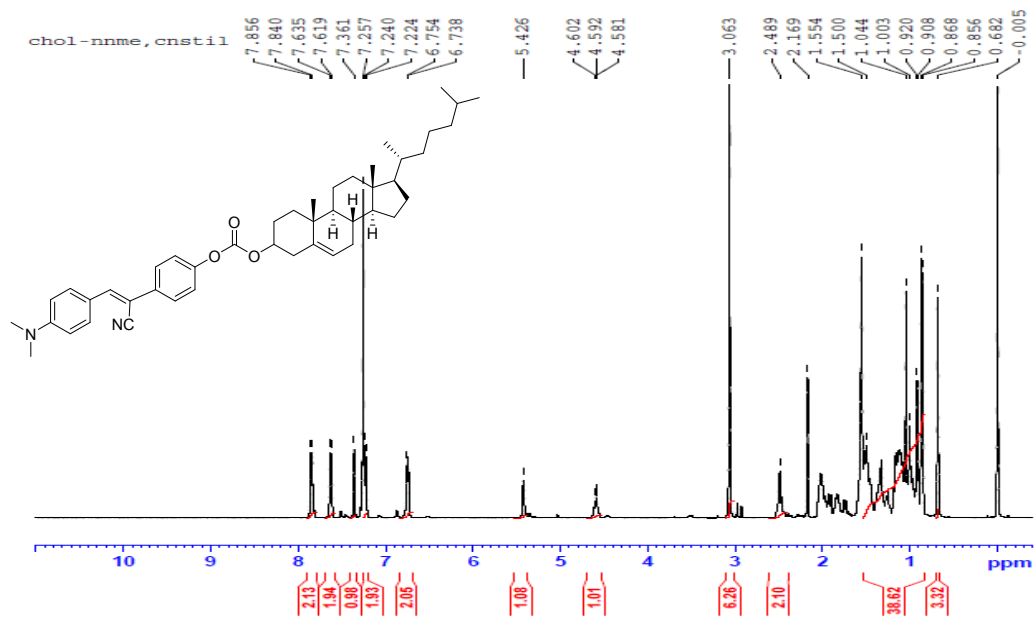

# <sup>13</sup>C-NMR of stilbene-cholesterol (2)

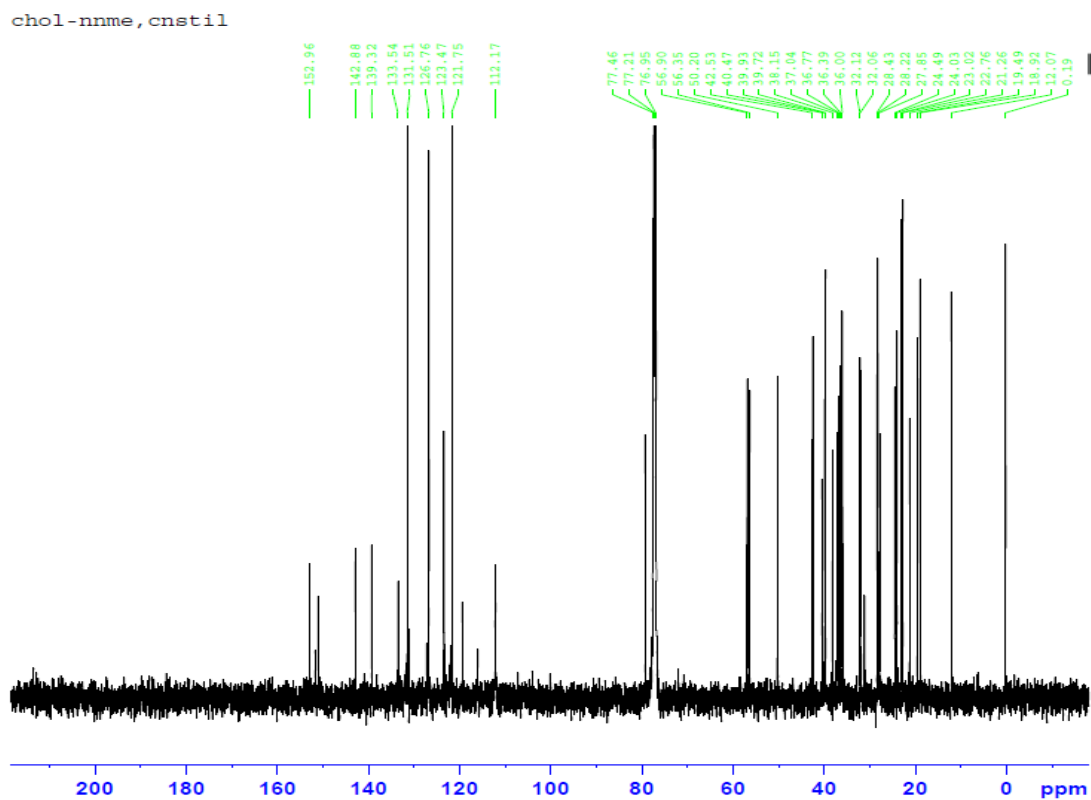

## Mass spectra of stilbene cholesterol (2)

Exact mass 676.46

Mass obtained in positive mode 677.3047(M+1)

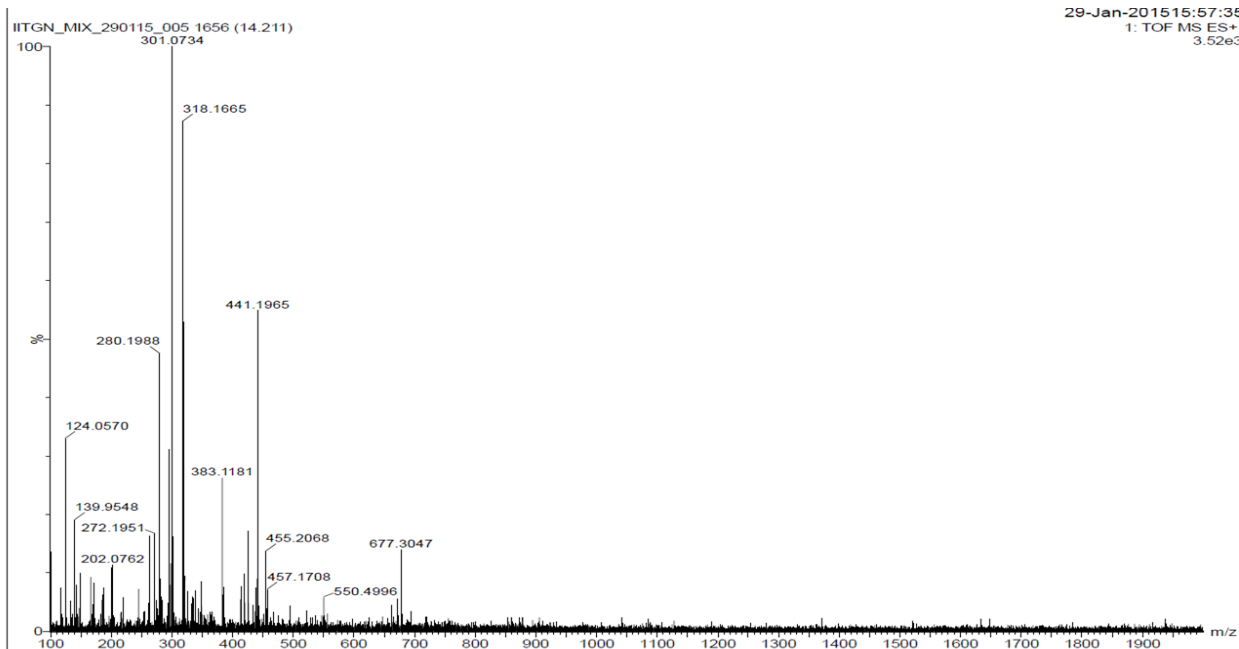

## <sup>1</sup>H NMR of diene-cholesterol (4)

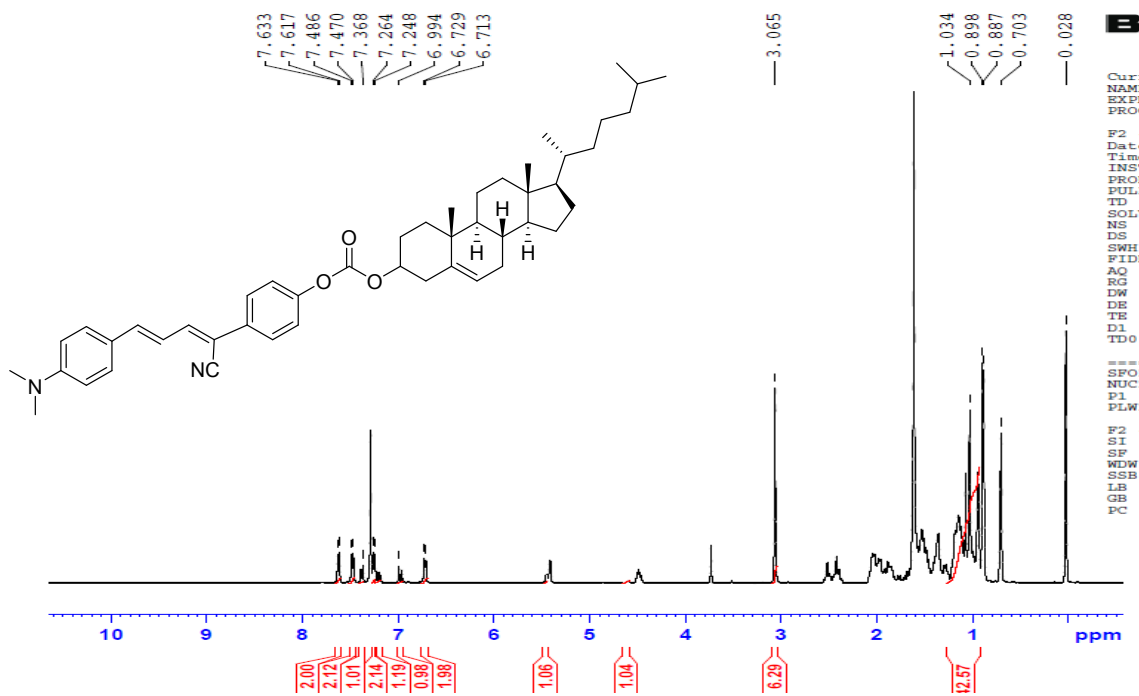

# <sup>13</sup>C NMR of diene-cholesterol (4)

diene-choL, NNME, CN

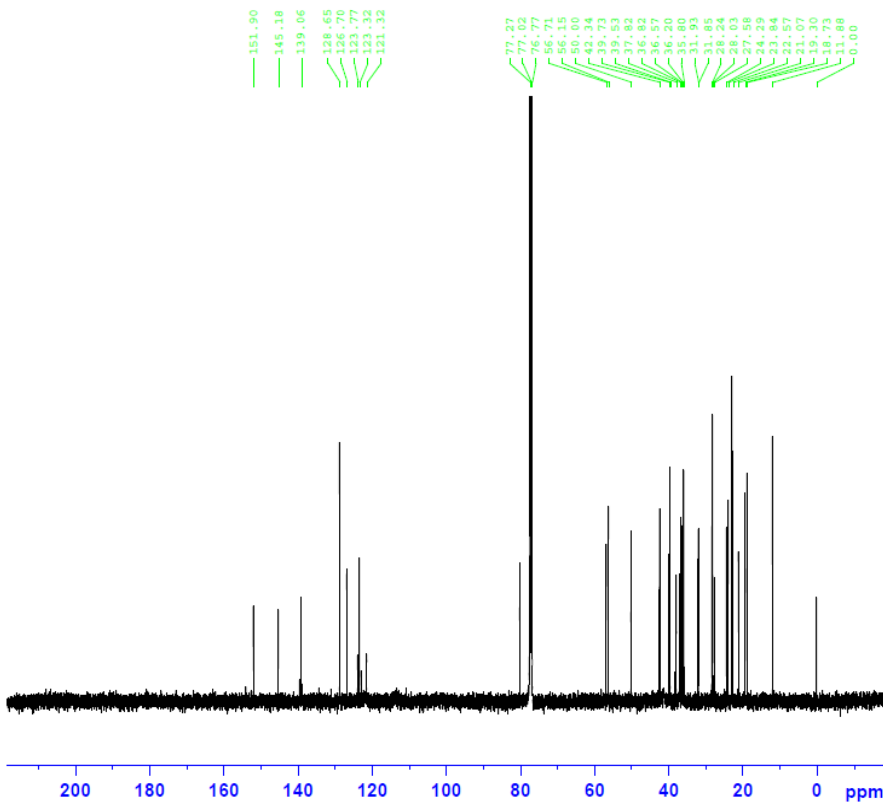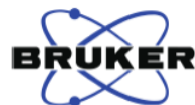

```
Current Data Parameters
NAME          Bhadra
EXPNO         228
PROCNO        1

F2 - Acquisition Parameters
Date_         20130328
Time          23.20
INSTRUM       spect
PROBHD        5 mm PABBO BB/
FULPROG       zgpg30
TD            65536
SOLVENT       CDCl3
NS            5000
DS            4
SWH           29761.904 Hz
FIDRES        0.454131 Hz
AQ            1.1010048 sec
RG            200.08
DW            16.800 usec
DE            6.50 usec
TE            298.2 K
D1            2.00000000 sec
D11           0.03000000 sec
TD0           1

===== CHANNEL f1 =====
SFO1          125.7603047 MHz
NUC1           13C
P1            8.90 usec
PLW1          29.00000000 W

===== CHANNEL f2 =====
SFO2          500.0920004 MHz
NUC2           1H
CQDPRG[2]     waltz16
PCPD2         80.00 usec
PLW2          17.00000000 W
PLW12         0.52061999 W
PLW13         0.33320001 W

F2 - Processing parameters
SI            32768
SF            125.7477100 MHz
WDW           EM
SSB           0
LB            1.00 Hz
GB            0
PC            1.40
```

## Mass spectra of diene cholesterol (4)

Mass obtained in positive mode 702.7087 (M+1)

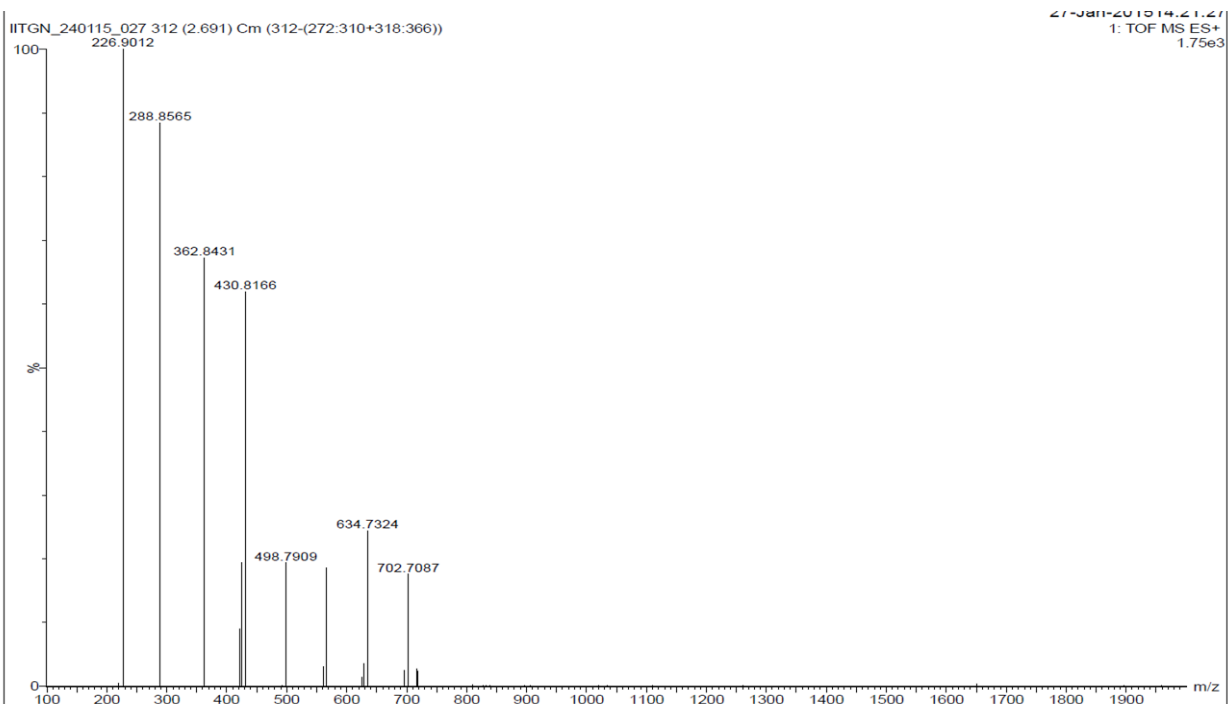

Supplement: c5ra04417k1.pdf [file c5ra04417k1.pdf]
